# Supplementary material for: MicroRNAs: Modulators of Cell Identity, and their Applications in Tissue Engineering
Source: PubMed Central journal article supplement — Microrna. 2014 Apr;3(1):45–53. doi: 10.2174/2211536603666140522003539 (PMC4262937; doi:10.2174/2211536603666140522003539), 2014-04
Supplement: MIRNA-3-45_SD1.pdf [file MIRNA-3-45_SD1.pdf]

## SUPPLEMENTARY MATERIALS

**MicroRNAs: Modulators of Cell Identity, and their Applications in Tissue Engineering**

Amanda O. Ribeiro<sup>1,#</sup>, Cláudia R. G. Schoof<sup>1,#</sup>, Alberto Izzotti<sup>2</sup>, Lygia V. Pereira<sup>1</sup> and Luciana R. Vasques<sup>1,\*</sup>

<sup>1</sup>Department of Genetics and Evolutionary Biology, University of Sao Paulo, Sao Paulo, Brazil; <sup>2</sup>Department of Health Sciences, University of Genoa, Italy/ Mutagenesis Unit, IRCCS San Martino Hospital-University-IST National Institute for Cancer Research, Genoa, Italy

**Supplementary Table S1. A comprehensive list of the main microRNAs involved with the regulation of organ and tissue genesis and development in mammals.**

| microRNA | Validated Target(s)    | Processes Regulated                                                                                                                   | Organism                       | Ref. |
|----------|------------------------|---------------------------------------------------------------------------------------------------------------------------------------|--------------------------------|------|
| let-7e   | Predicted targets only | Nephrogenesis (expression of early nephrogenic markers during embryoid bodies differentiation)                                        | Mice                           | [1]  |
| let-7f   | TIMP-1                 | Osteogenesis (mesenchymal stem cell growth and osteogenic differentiation)                                                            | Human                          | [2]  |
| miR-1    | Hand2                  | Cardiogenesis (cardiomyocytes differentiation and ventricular cardiomyocyte proliferation)                                            | Mice                           | [3]  |
|          | HDAC4                  | Skeletal muscle myogenesis (myogenic differentiation)                                                                                 | <i>Xenopus sp.</i> and mice    | [4]  |
|          | Klf4                   | Smooth muscle myogenesis (myogenic differentiation of embryonic stem cells)                                                           | Mice                           | [5]  |
|          | kayak                  | Cardiogenesis (modulation of cardiac cell progenitors polarity)                                                                       | <i>Drosophila sp.</i> and mice | [6]  |
|          | FZD7; FRS2             | Cardiogenesis (cardiomyocyte differentiation of embryonic stem cell derived-multipotent cardiovascular progenitors)                   | Human                          | [7]  |
| miR-7    |                        | Pancreatic function (potential role in the modulation of endocrine cell differentiation and/or function)                              | Human                          | [8]  |
|          | Pax6                   | Pancreatic development (modulation of endocrine cell differentiation)                                                                 | Mice                           | [9]  |
| miR-7a   | Barx1                  | Stomach organogenesis (modulation of gastric epithelial differentiation)                                                              | Mice                           | [10] |
| miR-9*   | Baf53a                 | Neurogenesis (dendritic development)                                                                                                  | Mice                           | [11] |
| miR-10a  | HOXA1                  | Megakaryocytopoiesis (megakaryocytic differentiation)                                                                                 | Human                          | [12] |
|          | HDAC4                  | Smooth muscle myogenesis (myogenic differentiation of embryonic stem cells)                                                           | Mice                           | [13] |
| miR-15a  | Dlk1                   | Cell proliferation (balance between cell density and cell growth in preadipocytes)                                                    | Mice                           | [14] |
| miR-17   | Mapk14; Stat3          | Pulmonary morphogenesis (modulation of embryonic epithelial branching)                                                                | Mice                           | [15] |
|          | Predicted targets only | Osteogenesis (osteogenic differentiation of adipose-derived stem cells)                                                               | Human                          | [16] |
| miR-18b  | FOXP1                  | Epithelial lineage development (epithelial lineage differentiation in embryonic stem cells and embryonal carcinoma pluripotent cells) | Human                          | [17] |
| miR-20a  | Mapk14; Stat3          | Pulmonary morphogenesis (modulation of embryonic epithelial branching)                                                                | Mice                           | [15] |
|          | Predicted targets only | Osteogenesis (osteogenic differentiation of adipose-derived stem cells)                                                               | Human                          | [16] |

(Table S1) contd....

| microRNA      | Validated Target(s)                                 | Processes Regulated                                                                                                                           | Organism                | Ref. |
|---------------|-----------------------------------------------------|-----------------------------------------------------------------------------------------------------------------------------------------------|-------------------------|------|
| miR-20b       | Predicted targets only                              | Osteogenesis (osteogenic differentiation of adipose-derived stem cells)                                                                       | Human                   | [16] |
| miR-21        | Predicted target only                               | Adipogenesis (adipocyte differentiation)                                                                                                      | Mice                    | [18] |
| miR-22        | HDAC6                                               | Osteogenesis (osteogenic differentiation of mesenchymal stem cells)                                                                           | Human                   | [19] |
| miR-23b       | PKA                                                 | Chondrogenesis (chondrogenic differentiation of mesenchymal stem cells)                                                                       | Human                   | [20] |
| miR-24        | P16 <sup>INK4a</sup>                                | Inhibits chondrogenesis in humans and mice                                                                                                    | Human and mice          | [21] |
| miR-26a       | SMAD1                                               | Osteogenesis (osteogenic differentiation of human adipose tissue-derived stem cells)                                                          | Human                   | [22] |
|               | SMAD1; SMAD4                                        | Vascular smooth muscle myogenesis and plasticity (modulation of smooth muscle cells proliferation, differentiation, migration, and apoptosis) | Human and mice          | [23] |
|               | TETs; TGD                                           | Pancreatic development (pancreatic cell differentiation)                                                                                      | Mice                    | [24] |
| miR-27        | Pax3                                                | Skeletal muscle myogenesis (skeletal muscle stem cells differentiation)                                                                       | Mice                    | [25] |
| miR-27a       | GCA                                                 | Osteogenesis (osteogenic differentiation of mesenchymal stem cells)                                                                           | Human                   | [26] |
|               | sFRP1                                               | Promotes osteoblastic differentiation in humans                                                                                               | Human                   | [27] |
|               | Runx1                                               | Hematopoiesis (megakaryocytic differentiation)                                                                                                | Human and mice          | [28] |
|               | PPAR $\gamma$                                       | Adipogenesis (adipogenic differentiation of preadipocytes)                                                                                    | Mice                    | [29] |
| miR-27b       | PPAR $\gamma$                                       | Adipogenesis (adipogenic differentiation of multipotent adipose-derived stem cells)                                                           | Human                   | [30] |
| miR-29a       | Osteonectin                                         | Osteogenesis (osteoblastic differentiation)                                                                                                   | Mice                    | [31] |
| miR-29b       | HDAC4; TGF $\beta$ 3;<br>Acvr2a; Ctnnbip1;<br>Dusp2 | Osteogenesis (down-regulation of inhibitors of osteoblast differentiation)                                                                    | Rat and mice            | [32] |
| miR-29c       | Osteonectin                                         | Osteogenesis (osteoblastic differentiation)                                                                                                   | Mice                    | [31] |
| miR-30a/c     | Snail1                                              | Chondrogenesis (tracheal chondrocytes differentiation)                                                                                        | Mice                    | [33] |
| miR-31        | Predicted targets only                              | Adipogenesis (adipogenic differentiation of adipose-derived stem cells)                                                                       | Rat                     | [34] |
|               | Krt16; Krt17; Dlx3;<br>Fgf10                        | Skin and appendages morphogenesis (anagen progression and hair shaft formation in the hair follicle)                                          | Mice                    | [35] |
|               | OSTERIX (SP7)                                       | Osteogenesis (osteogenic differentiation of mesenchymal stem cells)                                                                           | Human                   | [36] |
|               | Predicted targets only                              | Osteogenesis (osteogenic differentiation of adipose-derived stem cells)                                                                       | Human                   | [16] |
| miR-34 family | Cdk4; cyclin D1                                     | Epithelial formation (keratinocytes proliferation)                                                                                            | Mice                    | [37] |
| miR-92a       | Predicted targets only                              | Chondrogenesis (cartilage formation and chondrogenic differentiation of adipose-derived stem cells)                                           | Human                   | [38] |
| miR-100       | BMPR2                                               | Osteogenesis (osteogenic differentiation of mesenchymal stem cells)                                                                           | Human                   | [39] |
| miR-106       | Predicted targets only                              | Osteogenesis (osteogenic differentiation of adipose-derived stem cells)                                                                       | Human                   | [16] |
| miR-106b      | Mapk14; Stat3                                       | Pulmonary morphogenesis (modulation of embryonic epithelial branching)                                                                        | Mice                    | [15] |
| miR-124       | lamininy1; integrin $\beta$ 1                       | Neurogenesis (basal laminae integrity)                                                                                                        | Human, mice and chicken | [40] |
|               | Socs5                                               | Promotes differentiation of CD4+ T cells                                                                                                      | Human and mice          | [41] |
|               | Baf53a                                              | Neurogenesis (dendritic development)                                                                                                          | Mice                    | [11] |

(Table S1) contd....

| microRNA                 | Validated Target(s)    | Processes Regulated                                                                                                                                                | Organism                    | Ref.     |
|--------------------------|------------------------|--------------------------------------------------------------------------------------------------------------------------------------------------------------------|-----------------------------|----------|
|                          | Dlx2; Sox9; Jag1       | Neurogenesis (neuronal differentiation in the brain subventricular zone)                                                                                           | Mice                        | [42, 43] |
|                          | NFATc1                 | Osteoclastogenesis (osteoclast differentiation of bone marrow macrophages)                                                                                         | Mice                        | [44]     |
|                          | Sox9                   | Gonadal development (modulation of ovarian development and sex determination)                                                                                      | Mice                        | [45]     |
| miR-124a                 | Foxa2                  | Pancreatic development (modulation of signaling in beta-cells)                                                                                                     | Rat and mice                | [46]     |
|                          | Lhx2                   | Neurogenesis (prevention of retinal cones apoptosis and development of hippocampal neurons axons)                                                                  | Mice                        | [47]     |
| miR-125a/b               | Predicted targets only | Osteogenesis (osteogenic differentiation of adipose-derived stem cells)                                                                                            | Mice                        | [16]     |
| miR-125b                 | Snail1                 | Chondrogenesis (tracheal chondrocytes differentiation)                                                                                                             | Mice                        | [33]     |
|                          | Osx (predicted)        | Inhibits osteogenic differentiation                                                                                                                                | Human                       | [48]     |
|                          | Cbfb                   | Inhibits osteoblastic differentiation                                                                                                                              | Mice                        | [49]     |
| miR-126                  | SPRED1; VCAM1; PIK3R2  | Angiogenesis (vascular formation and blood vessels integrity; modulation of leukocyte adherence to endothelial cells, and potential role in vascular inflammation) | Mice, human and zebrafish   | [50, 51] |
| miR-127                  |                        | Pulmonary development (fetal lung branching morphogenesis)                                                                                                         | Rat                         | [52]     |
| miR-130a                 | MAFB                   | Hematopoiesis (megakaryocytic differentiation, platelet physiology)                                                                                                | Human                       | [12]     |
|                          | GAX; HOXA5             | Angiogenesis (modulation of angiogenesis in vascular endothelial cells)                                                                                            | Human                       | [53]     |
|                          | Hoxa5                  | Pulmonary development (modulation of airway and vascular morphogenesis)                                                                                            | Mice                        | [54]     |
| miR-132                  | p250GAP                | Neurogenesis and neuroplasticity (neuronal morphogenesis; dendritic spine formation in hippocampal neurons)                                                        | Rat                         | [55, 56] |
|                          |                        | Neuroplasticity (ocular dominance plasticity; dendritic spines maturation)                                                                                         | Mice                        | [57, 58] |
| miR-133                  | SRF                    | Skeletal muscle myogenesis (myoblast proliferation)                                                                                                                | Mice and <i>Xenopus sp.</i> | [4]      |
|                          | Sp1                    | Vascular muscle development and integrity (vascular smooth muscle cell phenotypic switch and vascular remodeling)                                                  | Rat                         | [59]     |
| miR-133a                 | SRF; cyclin D2         | Cardiogenesis (cardiomyocyte proliferation; suppression of smooth muscle genes)                                                                                    | Mice                        | [60]     |
| miR-136                  |                        | Chondrogenesis (cartilage formation and chondrogenic differentiation of adipose-derived stem cells)                                                                | Human                       | [38]     |
| miR-137                  | CDC42                  | Regulates differentiation adipose tissue-derived mesenchymal stem cells                                                                                            | Human                       | [61]     |
| miR-138                  | APT1                   | Neurogenesis and neuroplasticity (dendritic spine morphogenesis)                                                                                                   | Rat, mice and human         | [62]     |
|                          | EID-1                  | Adipogenesis (adipocyte differentiation of mesenchymal stem cells)                                                                                                 | Human                       | [63]     |
|                          | FAK                    | Osteogenesis (osteogenic differentiation of mesenchymal stem cells)                                                                                                | Human                       | [64]     |
| miR-140                  | Predicted targets only | Chondrogenesis (chondrogenic differentiation of mesenchymal stem cells; cartilage homeostasis)                                                                     | Human                       | [65]     |
|                          | Dnpep                  | Chondrogenesis (endochondral bone development)                                                                                                                     | Mice                        | [66]     |
|                          | RALA                   | Chondrogenesis (chondrogenic differentiation of mesenchymal stem cells)                                                                                            | Human                       | [67]     |
| miR-140-3p<br>miR-140-5p |                        | Gonadal development (modulation of Leydig cell numbers in developing testis)                                                                                       | Mice                        | [68]     |
| miR-143                  | Predicted targets only | Adipogenesis (adipocyte differentiation of preadipocytes)                                                                                                          | Human                       | [69]     |

(Table S1) contd....

| microRNA                                | Validated Target(s)            | Processes Regulated                                                                                              | Organism       | Ref.     |
|-----------------------------------------|--------------------------------|------------------------------------------------------------------------------------------------------------------|----------------|----------|
| miR-143<br>miR-145                      | Elk-1; Klf4; Myocd             | Smooth muscle myogenesis (smooth muscle differentiation and proliferation)                                       | Mice           | [70]     |
| miR-145                                 | Sox9                           | Chondrogenesis (chondrogenic differentiation of mesenchymal stem cells)                                          | Mice           | [71]     |
| miR-146a                                | CXCR4                          | Hematopoiesis (megakaryocytic proliferation, differentiation and maturation)                                     | Human          | [72]     |
| miR-148a                                | Rock1                          | Skeletal muscle myogenesis (myogenic differentiation of C2C12 myoblasts)                                         | Mice           | [73]     |
| miR-148b                                | Predicted targets only         | Osteogenesis (osteogenic differentiation of mesenchymal stem cells)                                              | Human          | [26]     |
| miR-150                                 | c-Myb                          | Hematopoiesis (modulation of megakaryocytes progenitor cell growth and differentiation)                          | Human and mice | [74, 75] |
| miR-153<br>miR-181a/a*<br>miR-324-3p/5p |                                | Induce neuronal differentiation of humans                                                                        | Human          | [76]     |
| miR-181                                 |                                | Hematopoiesis and immune response (B-lymphoid lineage differentiation)                                           | Mice           | [77]     |
|                                         | Hox-A11                        | Skeletal muscle myogenesis (myoblast differentiation)                                                            | Mice           | [78]     |
|                                         | NLK                            | Hematopoiesis and immune response (NK cells development)                                                         | Human          | [79]     |
| miR-181b                                | Six2                           | Nephrogenesis (modulation of metanephric mesenchymal cells proliferation)                                        | Mice           | [80]     |
| miR-193a                                | Predicted targets only         | Osteogenesis (osteogenic differentiation of adipose-derived stem cells)                                          | Human          | [16]     |
| miR-193b                                | Predicted targets only         | Chondrogenesis (cartilage formation and chondrogenic differentiation of adipose-derived stem cells)              | Human          | [38]     |
| miR-196a                                | HOXC8                          | Osteogenesis (osteogenic differentiation and proliferation of mesenchymal stem cells)                            | Human          | [81]     |
| miR-199a-3p<br>miR-199b-3p              | Predicted targets only         | Chondrogenesis (cartilage formation and chondrogenic differentiation of adipose-derived stem cells)              | Human          | [38]     |
| miR-199a-5p                             | VEGF                           | Cell proliferation and differentiation (fine-tuning of human adipose tissue-derived stem cells multipotency)     | Human          | [82]     |
|                                         | c-Kit                          | Promotes erythroid differentiation                                                                               | Human          | [83]     |
| miR-202-3p<br>miR-202-5p                |                                | Gonadal development (modulation of testis development and sex determination)                                     | Mice           | [84]     |
| miR-203                                 | P63 ( $\Delta$ Np63 $\alpha$ ) | Epithelial lineage development (epithelial differentiation and stratification, and keratinocyte differentiation) | Human and mice | [85, 86] |
|                                         | Barx1                          | Stomach organogenesis (modulation of gastric epithelial differentiation)                                         | Mice           | [10]     |
|                                         |                                | Skin and appendages morphogenesis (sebaceous lipogenesis)                                                        | Human          | [87]     |
| miR-204<br>miR-211                      | Runx2                          | Osteogenesis/adipogenesis (modulation of alternative fates of mesenchymal progenitor cells)                      | Human and mice | [88]     |
| miR-206                                 | Fstl1; Utrn                    | Skeletal muscle myogenesis (myoblast differentiation)                                                            | Mice           | [89]     |
|                                         | Pola1; Bind1; Cx43; Mmd        | Skeletal muscle myogenesis (myoblast differentiation)                                                            | Mice           | [90]     |
|                                         | Cx43                           | Skeletal muscle myogenesis (regulation of muscular gap junctions)                                                | Mice and human | [91]     |
|                                         | Cx43                           | Osteogenesis (modulation of osteoblast differentiation)                                                          | Mice           | [92]     |

(Table S1) contd....

| microRNA            | Validated Target(s)                  | Processes Regulated                                                                                                                 | Organism            | Ref.       |
|---------------------|--------------------------------------|-------------------------------------------------------------------------------------------------------------------------------------|---------------------|------------|
| miR-210             | Predicted targets only               | Chondrogenesis (cartilage formation and chondrogenic differentiation of adipose-derived stem cells)                                 | Human               | [38]       |
|                     | Hif1a                                | Inhibits differentiation of immune system cells                                                                                     | Human               | [93]       |
| miR-214             | Ezh2                                 | Skeletal muscle myogenesis (myogenic differentiation of embryonic stem cells)                                                       | Mice                | [94]       |
| miR-218             | RUNX2                                | Osteogenesis (osteogenic induction and differentiation of dental stem cells)                                                        | Human               | [95]       |
|                     | SFRP2; DKK2                          | Osteogenesis (osteogenic differentiation of adipose tissue-derived stem cells)                                                      | Human               | [96]       |
| miR-219             | PDGFR $\alpha$ ; Sox6; FoxJ3; ZFP238 | Neurogenesis (oligodendrocyte differentiation and myelination)                                                                      | Mice                | [97]       |
| miR-221             | Kit                                  | Hematopoiesis and erythropoiesis (erythroid differentiation of cord blood hematopoietic progenitor cells)                           | Human               | [98]       |
|                     | p27                                  | Skeletal muscle myogenesis (myoblast differentiation and assembly of sarcomeres in myotubes)                                        | Mice                | [99]       |
|                     | Predicted targets only               | Osteogenesis (osteogenic differentiation)                                                                                           | Human               | [100]      |
|                     | Hoxb5                                | Pulmonary development (modulation of airway and vascular morphogenesis)                                                             | Mice                | [54]       |
| miR-222             | Kit                                  | Hematopoiesis and erythropoiesis (erythroid differentiation of cord blood hematopoietic progenitor cells)                           | Human               | [98]       |
|                     |                                      | Articular cartilage homeostasis (potential regulator of the cartilage mechanotransduction pathway)                                  | Bovine              | [101]      |
|                     | p27                                  | Skeletal muscle myogenesis (myoblast differentiation and assembly of sarcomeres in myotubes)                                        | Mice                | [99]       |
| miR-223             | NFI-A                                | Hematopoiesis (granulocytic differentiation of progenitor cells)                                                                    | Human               | [102]      |
|                     | Mef2c                                | Hematopoiesis (granulocytic differentiation of progenitor cells and modulation of inflammatory response via neutrophil sensitivity) | Mice                | [103]      |
|                     | LMO2                                 | Hematopoiesis and erythropoiesis (erythroid differentiation of cord blood hematopoietic progenitor cells)                           | Human               | [104]      |
| miR-224             | Egr2; ACSL4                          | Adipogenesis (adipocyte differentiation of 3T3-L1 cells)                                                                            | Mice                | [105]      |
| miR-320c            |                                      | Chondrogenesis (cartilage formation and chondrogenic differentiation of adipose-derived stem cells)                                 | Human               | [38]       |
| miR-326             | Predicted targets only               | Adipogenesis (adipogenic differentiation of adipose-derived stem cells)                                                             | Rat                 | [34]       |
| miR-329             | CD146                                | Angiogenesis (modulation of endothelial cell migration and tube formation)                                                          | Mice and human      | [106]      |
| miR-375             |                                      | Pancreatic development (modulation of pancreatic islet morphology and development)                                                  | Human               | [107, 108] |
|                     | HuD                                  | Neurogenesis and neuronal plasticity (modulation of dendrite formation)                                                             | Rat, mice and human | [109]      |
| miR-379-410 cluster | N-cadherin                           | Promotes neural stem cell differentiation in mice                                                                                   | Mice                | [110]      |
| miR-381             | Predicted targets only               | Chondrogenesis (cartilage formation and chondrogenic differentiation of adipose-derived stem cells)                                 | Human               | [38]       |
| miR-432             | NES, RCOR1/COREST, MECP2             | Neurogenesis (enhances the formation of neurites)                                                                                   | Human               | [111]      |
| miR-455-3p          | Predicted targets only               | Chondrogenesis (cartilage formation and chondrogenic differentiation of adipose-derived stem cells)                                 | Human               | [38]       |

(Table S1) contd....

| microRNA   | Validated Target(s)           | Processes Regulated                                                                                                                   | Organism | Ref.  |
|------------|-------------------------------|---------------------------------------------------------------------------------------------------------------------------------------|----------|-------|
| miR-489    | GCA                           | Osteogenesis (osteogenic differentiation of mesenchymal stem cells)                                                                   | Human    | [26]  |
| miR-495    | Sox9                          | Inhibition of chondrogenic differentiation of mesenchymal stem cells                                                                  | Human    | [112] |
|            | Dnmt3a                        | Inhibition of mesendoderm differentiation                                                                                             | Mice     | [113] |
| miR-499    | Predicted targets only        | Cardiogenesis (cardiac differentiation of embryonic stem cells)                                                                       | Human    | [114] |
| miR-518b   | FOXP1                         | Epithelial lineage development (epithelial lineage differentiation in embryonic stem cells and embryonal carcinoma pluripotent cells) | Human    | [17]  |
| miR-574-3p | RXR $\alpha$                  | Chondrogenesis (chondrogenic differentiation of mesenchymal stem cells)                                                               | Human    | [115] |
|            |                               | Skin and appendages morphogenesis (sebaceous lipogenesis)                                                                             | Human    | [87]  |
| miR-675    |                               | Chondrogenesis (chondrogenic differentiation and cartilage matrix production)                                                         | Human    | [116] |
| miR-2861   | HDAC5                         | Osteogenesis (osteoblast differentiation)                                                                                             | Mice     | [117] |
| miR-3960   | Hoxa2                         | Osteogenesis (osteoblast differentiation)                                                                                             | Mice     | [118] |
| miR-4448   | Prediction of SMAD1 and SMAD4 | Inhibits osteoblast differentiation                                                                                                   | Human    | [119] |
| miR-4708   |                               |                                                                                                                                       |          |       |
| miR-4773   |                               |                                                                                                                                       |          |       |

## TABLE S1 REFERENCES

- [1] Viñas JL, Ventayol M, Brune B, *et al.* miRNA let-7e modulates the Wnt pathway and early nephrogenic markers in mouse embryonic stem cell differentiation. *PLoS One* 2013; 8: e60937.
- [2] Egea V, Zahler S, Rieth N, *et al.* Tissue inhibitor of metalloproteinase-1 (TIMP-1) regulates mesenchymal stem cells through let-7f microRNA and Wnt/beta-catenin signaling. *Proc Natl Acad Sci U S A* 2012; 109: E309-16.
- [3] Zhao Y, Samal E, Srivastava D. Serum response factor regulates a muscle-specific microRNA that targets Hand2 during cardiogenesis. *Nature* 2005; 436: 214-20.
- [4] Chen JF, Mandel EM, Thomson JM, *et al.* The role of microRNA-1 and microRNA-133 in skeletal muscle proliferation and differentiation. *Nat Genet* 2006; 38: 228-33.
- [5] Xie C, Huang H, Sun X, *et al.* MicroRNA-1 regulates smooth muscle cell differentiation by repressing Kruppel-like factor 4. *Stem Cells Dev* 2011; 20: 205-10.
- [6] King IN, Qian L, Liang J, *et al.* A genome-wide screen reveals a role for microRNA-1 in modulating cardiac cell polarity. *Dev Cell* 2011; 20: 497-510.
- [7] Lu TY, Lin B, Li Y, *et al.* Overexpression of microRNA-1 promotes cardiomyocyte commitment from human cardiovascular progenitors via suppressing WNT and FGF signaling pathways. *J Mol Cell Cardiol* 2013; 63: 146-54.
- [8] Correa-Medina M, Bravo-Egana V, Rosero S, *et al.* MicroRNA miR-7 is preferentially expressed in endocrine cells of the developing and adult human pancreas. *Gene Expr Patterns* 2009; 9: 193-9.
- [9] Kredon-Russo S, Mandelbaum AD, Ness A, *et al.* Pancreas-enriched miRNA refines endocrine cell differentiation. *Development* 2012; 139: 3021-31.
- [10] Kim BM, Woo J, Kanellopoulou C, Shivdasani RA. Regulation of mouse stomach development and Barx1 expression by specific microRNAs. *Development* 2011; 138: 1081-6.
- [11] Yoo AS, Staahl BT, Chen L, Crabtree GR. MicroRNA-mediated switching of chromatin-remodelling complexes in neural development. *Nature* 2009; 460: 642-6.
- [12] Garzon R, Pichiorri F, Palumbo T, *et al.* MicroRNA fingerprints during human megakaryocytopoiesis. *Proc Natl Acad Sci U S A* 2006; 103: 5078-83.
- [13] Huang H, Xie C, Sun X, Chen YE. miR-10a contributes to retinoid acid-induced smooth muscle cell differentiation. *J Biol Chem* 2010; 285: 9383-9.
- [14] Andersen DC, Jensen CH, Schneider M, *et al.* MicroRNA-15a fine-tunes the level of Delta-like 1 homolog (DLK1) in proliferating 3T3-L1 preadipocytes. *Exp Cell Res* 2010; 316: 1681-91.
- [15] Carraro G, El-Hashash A, Guidolin D, *et al.* miR-17 family of microRNAs controls FGF10-mediated embryonic lung epithelial branching morphogenesis through MAPK14 and STAT3 regulation of E-Cadherin distribution. *Dev Biol* 2009; 333: 238-50.
- [16] Zhang ZJ, Zhang H, Kang Y, *et al.* miRNA expression profile during osteogenic differentiation of human adipose-derived stem cells. *J Cell Biochem* 2012; 113: 888-98.
- [17] Kushwaha R, Thodima V, Tomishima MJ, Bosl GJ, Chaganti R. Mir-18 and mir-518b target FOXP1 during epithelial lineage differentiation in pluripotent cells. *Stem Cells Dev* 2014.
- [18] Kang M, Yan LM, Zhang WY, Li YM, Tang AZ, Ou HS. Role of microRNA-21 in regulating 3T3-L1 adipocyte differentiation and adiponectin expression. *Mol Biol Rep* 2013; 40: 5027-34.
- [19] Huang S, Wang S, Bian C, *et al.* Upregulation of miR-22 promotes osteogenic differentiation and inhibits adipogenic differentiation of human adipose tissue-derived mesenchymal stem cells by repressing HDAC6 protein expression. *Stem Cells Dev* 2012; 21: 2531-40.
- [20] Ham O, Song BW, Lee SY, *et al.* The role of microRNA-23b in the differentiation of MSC into chondrocyte by targeting protein kinase A signaling. *Biomaterials* 2012; 33: 4500-7.
- [21] Philipot D, Guerit D, Platano D, *et al.* p16INK4a and its regulator miR-24 link senescence and chondrocyte terminal differentiation-associated matrix remodelling in osteoarthritis. *Arthritis Res Ther* 2014; 16: R58.

- [22] Luzi E, Marini F, Sala SC, *et al.* Osteogenic differentiation of human adipose tissue-derived stem cells is modulated by the miR-26a targeting of the SMAD1 transcription factor. *J Bone Miner Res* 2008; 23: 287-95.
- [23] Leeper NJ, Raiesdana A, Kojima Y, *et al.* MicroRNA-26a is a novel regulator of vascular smooth muscle cell function. *J Cell Physiol* 2011; 226: 1035-43.
- [24] Fu X, Jin L, Wang X, *et al.* MicroRNA-26a targets ten eleven translocation enzymes and is regulated during pancreatic cell differentiation. *Proc Natl Acad Sci U S A* 2013; 110: 17892-7.
- [25] Crist CG, Montarras D, Pallafacchina G, *et al.* Muscle stem cell behavior is modified by microRNA-27 regulation of Pax3 expression. *Proc Natl Acad Sci U S A* 2009; 106: 13383-7.
- [26] Schoolmeesters A, Eklund T, Leake D, *et al.* Functional profiling reveals critical role for miRNA in differentiation of human mesenchymal stem cells. *PLoS One* 2009; 4: e5605.
- [27] Guo D, Li Q, Lv Q, Wei Q, Cao S, Gu J. MiR-27a targets sFRP1 in hFOB cells to regulate proliferation, apoptosis and differentiation. *PLoS One* 2014; 9: e91354.
- [28] Ben-Ami O, Pencovich N, Lotem J, Levanon D, Groner Y. A regulatory interplay between miR-27a and Runx1 during megakaryopoiesis. *Proc Natl Acad Sci U S A* 2009; 106: 238-43.
- [29] Kim SY, Kim AY, Lee HW, *et al.* MiR-27a is a negative regulator of adipocyte differentiation via suppressing PPARgamma expression. *Biochem Biophys Res Commun* 2010; 392: 323-8.
- [30] Karbiener M, Fischer C, Nowitsch S, *et al.* MicroRNA miR-27b impairs human adipocyte differentiation and targets PPARgamma. *Biochem Biophys Res Commun* 2009; 390: 247-51.
- [31] Kapinas K, Kessler CB, Delany AM. miR-29 suppression of osteonectin in osteoblasts: regulation during differentiation and by canonical Wnt signaling. *J Cell Biochem* 2009; 108: 216-24.
- [32] Li Z, Hassan MQ, Jafferji M, *et al.* Biological functions of miR-29b contribute to positive regulation of osteoblast differentiation. *J Biol Chem* 2009; 284: 15676-84.
- [33] Gradus B, Alon I, Hornstein E. miRNAs control tracheal chondrocyte differentiation. *Dev Biol* 2011; 360: 58-65.
- [34] Tang YF, Zhang Y, Li XY, Li C, Tian W, Liu L. Expression of miR-31, miR-125b-5p, and miR-326 in the adipogenic differentiation process of adipose-derived stem cells. *OMICS* 2009; 13: 331-6.
- [35] Mardaryev AN, Ahmed MI, Vlahov NV, *et al.* Micro-RNA-31 controls hair cycle-associated changes in gene expression programs of the skin and hair follicle. *FASEB J* 2010; 24: 3869-81.
- [36] Baglio SR, Devescovi V, Granchi D, Baldini N. MicroRNA expression profiling of human bone marrow mesenchymal stem cells during osteogenic differentiation reveals Osterix regulation by miR-31. *Gene* 2013; 527: 321-31.
- [37] Antonini D, Russo MT, De Rosa L, Gorrese M, Del Vecchio L, Missero C. Transcriptional repression of miR-34 family contributes to p63-mediated cell cycle progression in epidermal cells. *J Invest Dermatol* 2010; 130: 1249-57.
- [38] Zhang Z, Kang Y, Zhang H, *et al.* Expression of microRNAs during chondrogenesis of human adipose-derived stem cells. *Osteoarthritis Cartilage* 2012; 20: 1638-46.
- [39] Zeng Y, Qu X, Li H, *et al.* MicroRNA-100 regulates osteogenic differentiation of human adipose-derived mesenchymal stem cells by targeting BMP2. *FEBS Lett* 2012; 586: 2375-81.
- [40] Cao X, Pfaff SL, Gage FH. A functional study of miR-124 in the developing neural tube. *Genes Dev* 2007; 21: 531-6.
- [41] Jiang S, Li C, McRae G, *et al.* MeCP2 reinforces STAT3 signaling and the generation of effector CD4+ T cells by promoting miR-124-mediated suppression of SOCS5. *Sci Signal* 2014; 7: ra25.
- [42] Akerblom M, Sachdeva R, Barde I, *et al.* MicroRNA-124 is a subventricular zone neuronal fate determinant. *J Neurosci* 2012; 32: 8879-89.
- [43] Cheng LC, Pastrana E, Tavazoie M, Doetsch F. miR-124 regulates adult neurogenesis in the subventricular zone stem cell niche. *Nat Neurosci* 2009; 12: 399-408.
- [44] Lee Y, Kim HJ, Park CK, *et al.* MicroRNA-124 regulates osteoclast differentiation. *Bone* 2013; 56: 383-9.
- [45] Real FM, Sekido R, Lupianez DG, Lovell-Badge R, Jimenez R, Burgos M. A microRNA (mmu-miR-124) prevents *Sox9* expression in developing mouse ovarian cells. *Biol Reprod* 2013; 89: 78.
- [46] Baroukh N, Ravier MA, Loder MK, *et al.* MicroRNA-124a regulates *Foxa2* expression and intracellular signaling in pancreatic beta-cell lines. *J Biol Chem* 2007; 282: 19575-88.
- [47] Sanuki R, Onishi A, Koike C, *et al.* miR-124a is required for hippocampal axogenesis and retinal cone survival through *Lhx2* suppression. *Nat Neurosci* 2011; 14: 1125-34.
- [48] Chen S, Yang L, Jie Q, *et al.* MicroRNA-125b suppresses the proliferation and osteogenic differentiation of human bone marrow-derived mesenchymal stem cells. *Mol Med Rep* 2014; 9: 1820-6.
- [49] Huang K, Fu J, Zhou W, *et al.* MicroRNA-125b regulates osteogenic differentiation of mesenchymal stem cells by targeting *Cbfbeta* *in vitro*. *Biochimie* 2014.
- [50] Fish JE, Santoro MM, Morton SU, *et al.* miR-126 regulates angiogenic signaling and vascular integrity. *Dev Cell* 2008; 15: 272-84.
- [51] Harris TA, Yamakuchi M, Ferlito M, Mendell JT, Lowenstein CJ. MicroRNA-126 regulates endothelial expression of vascular cell adhesion molecule 1. *Proc Natl Acad Sci U S A* 2008; 105: 1516-21.
- [52] Bhaskaran M, Wang Y, Zhang H, *et al.* MicroRNA-127 modulates fetal lung development. *Physiol Genomics* 2009; 37: 268-78.
- [53] Chen Y, Gorski DH. Regulation of angiogenesis through a microRNA (miR-130a) that down-regulates antiangiogenic homeobox genes *GAX* and *HOXA5*. *Blood* 2008; 111: 1217-26.
- [54] Mujahid S, Nielsen HC, Volpe MV. MiR-221 and miR-130a regulate lung airway and vascular development. *PLoS One* 2013; 8: e55911.
- [55] Vo N, Klein ME, Varlamova O, *et al.* A cAMP-response element binding protein-induced microRNA regulates neuronal morphogenesis. *Proc Natl Acad Sci U S A* 2005; 102: 16426-31.
- [56] Impy S, Davare M, Lesiak A, *et al.* An activity-induced microRNA controls dendritic spine formation by regulating *Rac1*-PAK signaling. *Mol Cell Neurosci* 2010; 43: 146-56.
- [57] Mellios N, Sugihara H, Castro J, *et al.* miR-132, an experience-dependent microRNA, is essential for visual cortex plasticity. *Nat Neurosci* 2011; 14: 1240-2.
- [58] Tognini P, Putignano E, Coatti A, Pizzorusso T. Experience-dependent expression of miR-132 regulates ocular dominance plasticity. *Nat Neurosci* 2011; 14: 1237-9.
- [59] Torella D, Iaconetti C, Catalucci D, *et al.* MicroRNA-133 controls vascular smooth muscle cell phenotypic switch *in vitro* and vascular remodeling *in vivo*. *Circ Res* 2011; 109: 880-93.
- [60] Liu N, Bezprozvannaya S, Williams AH, *et al.* microRNA-133a regulates cardiomyocyte proliferation and suppresses smooth muscle gene expression in the heart. *Genes Dev* 2008; 22: 3242-54.
- [61] Shin KK, Kim YS, Kim JY, Bae YC, Jung JS. MiR-137 controls proliferation and differentiation of human adipose tissue stromal cells. *Cell Physiol Biochem* 2014; 33: 758-68.
- [62] Siegel G, Obermosterer G, Fiore R, *et al.* A functional screen implicates microRNA-138-dependent regulation of the depalmitoylation enzyme *APT1* in dendritic spine morphogenesis. *Nat Cell Biol* 2009; 11: 705-16.

- [63] Yang Z, Bian C, Zhou H, *et al.* MicroRNA hsa-miR-138 inhibits adipogenic differentiation of human adipose tissue-derived mesenchymal stem cells through adenovirus EID-1. *Stem Cells Dev* 2011; 20: 259-67.
- [64] Eskildsen T, Taipaleenmaki H, Stenvang J, Abdallah BM, Ditzel N, Nossent AY, *et al.* MicroRNA-138 regulates osteogenic differentiation of human stromal (mesenchymal) stem cells *in vivo*. *Proc Natl Acad Sci U S A* 2011; 108: 6139-44.
- [65] Miyaki S, Nakasa T, Otsuki S, *et al.* MicroRNA-140 is expressed in differentiated human articular chondrocytes and modulates interleukin-1 responses. *Arthritis Rheum* 2009; 60: 2723-30.
- [66] Nakamura Y, Inloes JB, Katagiri T, Kobayashi T. Chondrocyte-specific microRNA-140 regulates endochondral bone development and targets Dnpep to modulate bone morphogenetic protein signaling. *Mol Cell Biol* 2011; 31: 3019-28.
- [67] Karlsen TA, Jakobsen RB, Mikkelsen TS, Brinchmann JE. microRNA-140 Targets RALA and Regulates Chondrogenic Differentiation of Human Mesenchymal Stem Cells by Translational Enhancement of SOX9 and ACAN. *Stem Cells Dev* 2014; 23: 290-304.
- [68] Rakoczy J, Fernandez-Valverde SL, Glazov EA, *et al.* MicroRNAs-140-5p/140-3p modulate Leydig cell numbers in the developing mouse testis. *Biol Reprod* 2013; 88: 143.
- [69] Esau C, Kang X, Peralta E, *et al.* MicroRNA-143 regulates adipocyte differentiation. *J Biol Chem* 2004; 279: 52361-5.
- [70] Cordes KR, Sheehy NT, White MP, *et al.* miR-145 and miR-143 regulate smooth muscle cell fate and plasticity. *Nature* 2009; 460: 705-10.
- [71] Yang B, Guo H, Zhang Y, Chen L, Ying D, Dong S. MicroRNA-145 regulates chondrogenic differentiation of mesenchymal stem cells by targeting Sox9. *PLoS One* 2011; 6: e21679.
- [72] Labbaye C, Spinello I, Quaranta MT, *et al.* A three-step pathway comprising PLZF/miR-146a/CXCR4 controls megakaryopoiesis. *Nat Cell Biol* 2008; 10: 788-801.
- [73] Zhang J, Ying ZZ, Tang ZL, Long LQ, Li K. MicroRNA-148a promotes myogenic differentiation by targeting the ROCK1 gene. *J Biol Chem* 2012; 287: 21093-101.
- [74] Barroga CF, Pham H, Kaushansky K. Thrombopoietin regulates c-Myb expression by modulating micro RNA 150 expression. *Exp Hematol* 2008; 36: 1585-92.
- [75] Lu J, Guo S, Ebert BL, *et al.* MicroRNA-mediated control of cell fate in megakaryocyte-erythrocyte progenitors. *Dev Cell* 2008; 14: 843-53.
- [76] Stappert L, Borghese L, Roese-Koerner B, *et al.* MicroRNA-based promotion of human neuronal differentiation and subtype specification. *PLoS One* 2013; 8: e59011.
- [77] Chen CZ, Li L, Lodish HF, Bartel DP. MicroRNAs modulate hematopoietic lineage differentiation. *Science* 2004; 303: 83-6.
- [78] Naguibneva I, Ameyar-Zazoua M, Poleskaya A, *et al.* The microRNA miR-181 targets the homeobox protein Hox-A11 during mammalian myoblast differentiation. *Nat Cell Biol* 2006; 8: 278-84.
- [79] Cichocki F, Felices M, McCullar V, *et al.* Cutting edge: microRNA-181 promotes human NK cell development by regulating Notch signaling. *J Immunol* 2011; 187: 6171-5.
- [80] Iyu Z, Mao Z, Wang H, *et al.* MiR-181b targets *Six2* and inhibits the proliferation of metanephric mesenchymal cells *in vitro*. *Biochem Biophys Res Commun* 2013; 440: 495-501.
- [81] Kim YJ, Bae SW, Yu SS, Bae YC, Jung JS. miR-196a regulates proliferation and osteogenic differentiation in mesenchymal stem cells derived from human adipose tissue. *J Bone Miner Res* 2009; 24: 816-25.
- [82] Chen G, Shi X, Sun C, *et al.* VEGF-mediated proliferation of human adipose tissue-derived stem cells. *PLoS One* 2013; 8: e73673.
- [83] Li Y, Bai H, Zhang Z, *et al.* The up-regulation of miR-199b-5p in erythroid differentiation is associated with GATA-1 and NF-E2. *Mol Cells* 2014; 37: 213-9.
- [84] Wainwright EN, Jorgensen JS, Kim Y, *et al.* SOX9 regulates microRNA miR-202-5p/3p expression during mouse testis differentiation. *Biol Reprod* 2013; 89: 34.
- [85] Yi R, Poy MN, Stoffel M, Fuchs E. A skin microRNA promotes differentiation by repressing 'stemness'. *Nature* 2008; 452: 225-9.
- [86] Lena AM, Shalom-Feuerstein R, Cervo PRV, *et al.* miR-203 represses 'stemness' by repressing  $\Delta Np63$ . *Cell Death Differ* 2008; 15: 1187-95.
- [87] Schneider MR, Samborski A, Bauersachs S, Zouboulis CC. Differentially regulated microRNAs during human sebaceous lipogenesis. *J Dermatol Sci* 2013; 70: 88-93.
- [88] Huang J, Zhao L, Xing L, Chen D. MicroRNA-204 regulates Runx2 protein expression and mesenchymal progenitor cell differentiation. *Stem Cells* 2010; 28: 357-64.
- [89] Rosenberg MI, Georges SA, Asawachaicharn A, Analau E, Tapscott SJ. MyoD inhibits *Fstll* and *Utrn* expression by inducing transcription of miR-206. *J Cell Biol* 2006; 175: 77-85.
- [90] Kim HK, Lee YS, Sivaprasad U, Malhotra A, Dutta A. Muscle-specific microRNA miR-206 promotes muscle differentiation. *J Cell Biol* 2006; 174: 677-87.
- [91] Anderson C, Catoe H, Werner R. miR-206 regulates connexin43 expression during skeletal muscle development. *Nucleic Acids Res* 2006; 34: 5863-71.
- [92] Inose H, Ochi H, Kimura A, *et al.* A microRNA regulatory mechanism of osteoblast differentiation. *Proc Natl Acad Sci U S A* 2009; 106: 20794-9.
- [93] Wang H, Flach H, Onizawa M, Wei L, McManus MT, Weiss A. Negative regulation of *Hif1a* expression and TH17 differentiation by the hypoxia-regulated microRNA miR-210. *Nat Immunol* 2014; 15: 393-401.
- [94] Juan AH, Kumar RM, Marx JG, Young RA, Sartorelli V. Mir-214-dependent regulation of the polycomb protein Ezh2 in skeletal muscle and embryonic stem cells. *Mol Cell* 2009; 36: 61-74.
- [95] Gay I, Cavender A, Peto D, *et al.* Differentiation of human dental stem cells reveals a role for microRNA-218. *J Periodontol Res* 2014; 49: 110-20.
- [96] Zhang WB, Zhong WJ, Wang L. A signal-amplification circuit between miR-218 and Wnt/beta-catenin signal promotes human adipose tissue-derived stem cells osteogenic differentiation. *Bone* 2014; 58: 59-66.
- [97] Dugas JC, Cuellar TL, Scholze A, *et al.* Dicer1 and miR-219 are required for normal oligodendrocyte differentiation and myelination. *Neuron* 2010; 65: 597-611.
- [98] Felli N, Fontana L, Pelosi E, *et al.* MicroRNAs 221 and 222 inhibit normal erythropoiesis and erythroleukemic cell growth via kit receptor down-modulation. *Proc Natl Acad Sci U S A* 2005; 102: 18081-6.
- [99] Cardinali B, Castellani L, Fasanaro P, *et al.* MicroRNA-221 and microRNA-222 modulate differentiation and maturation of skeletal muscle cells. *PLoS One* 2009; 4: e7607.
- [100] Bakhshandeh B, Hafizi M, Ghaemi N, Soleimani M. Down-regulation of miRNA-221 triggers osteogenic differentiation in human stem cells. *Bio-technol Lett* 2012; 34: 1579-87.
- [101] Dunn W, DuRaine G, Reddi AH. Profiling microRNA expression in bovine articular cartilage and implications for mechanotransduction. *Arthritis Rheum* 2009; 60: 2333-9.
- [102] Fazi F, Rosa A, Fatica A, *et al.* A microcircuitry comprised of microRNA-223 and transcription factors NFI-A and C/EBPalpha regulates human granulopoiesis. *Cell* 2005; 123: 819-31.
- [103] Johnnidis JB, Harris MH, Wheeler RT, *et al.* Regulation of progenitor cell proliferation and granulocyte function by microRNA-223. *Nature* 2008; 451: 1125-9.
- [104] Felli N, Pedini F, Romania P, *et al.* MicroRNA 223-dependent expression of LMO2 regulates normal erythropoiesis. *Haematologica* 2009; 94: 479-86.
- [105] Peng Y, Xiang H, Chen C, *et al.* MiR-224 impairs adipocyte early differentiation and regulates fatty acid metabolism. *Int J Biochem Cell Biol* 2013; 45: 1585-93.



- [106] Wang P, Luo Y, Duan H, Xing S, Zhang J, Lu D, *et al.* MicroRNA 329 suppresses angiogenesis by targeting CD146. *Mol Cell Biol* 2013; 33: 3689-99.
- [107] Kloosterman WP, Lagendijk AK, Ketting RF, Moulton JD, Plasterk RH. Targeted inhibition of miRNA maturation with morpholinos reveals a role for miR-375 in pancreatic islet development. *PLoS Biol* 2007; 5: e203.
- [108] Joglekar MV, Joglekar VM, Hardikar AA. Expression of islet-specific microRNAs during human pancreatic development. *Gene Expr Patterns* 2009; 9: 109-13.
- [109] Abdelmohsen K, Hutchison ER, Lee EK, *et al.* miR-375 inhibits differentiation of neurites by lowering HuD levels. *Mol Cell Biol* 2010; 30: 4197-210.
- [110] Rago L, Beattie R, Taylor V, Winter J. miR379-410 cluster miRNAs regulate neurogenesis and neuronal migration by fine-tuning N-cadherin. *EMBO J* 2014.
- [111] Das E, Bhattacharyya NP. MicroRNA-432 contributes to dopamine cocktail and retinoic acid induced differentiation of human neuroblastoma cells by targeting *NESTIN* and *RCOR1* genes. *FEBS Lett* 2014.
- [112] Lee S, Yoon DS, Paik S, Lee KM, Jang Y, Lee JW. MicroRNA-495 inhibits chondrogenic differentiation in human mesenchymal stem cells by targeting Sox9. *Stem Cells Dev* 2014.
- [113] Yang D, Wang G, Zhu S, *et al.* MiR-495 suppresses mesendoderm differentiation of mouse embryonic stem cells via the direct targeting of *Dnmt3a*. *Stem Cell Res* 2014; 12: 550-61.
- [114] Wilson KD, Hu S, Venkatasubrahmanyam S, *et al.* Dynamic microRNA expression programs during cardiac differentiation of human embryonic stem cells: role for miR-499. *Circ Cardiovasc Genet* 2010; 3: 426-35.
- [115] Guerit D, Philipot D, Chuchana P, *et al.* Sox9-regulated miRNA-574-3p inhibits chondrogenic differentiation of mesenchymal stem cells. *PLoS One* 2013; 8: e62582.
- [116] Dudek KA, Lafont JE, Martinez-Sanchez A, Murphy CL. Type II collagen expression is regulated by tissue-specific miR-675 in human articular chondrocytes. *J Biol Chem* 2010; 285: 24381-7.
- [117] Li H, Xie H, Liu W, *et al.* A novel microRNA targeting HDAC5 regulates osteoblast differentiation in mice and contributes to primary osteoporosis in humans. *J Clin Invest* 2009; 119: 3666-77.
- [118] Hu R, Liu W, Li H, *et al.* A Runx2/miR-3960/miR-2861 regulatory feedback loop during mouse osteoblast differentiation. *J Biol Chem* 2011; 286: 12328-39.
- [119] Kato RB, Roy B, De Oliveira FS, *et al.* Nanotopography directs mesenchymal stem cells to osteoblast lineage through regulation of microRNA-SMAD-BMP-2 circuit. *J Cell Physiol* 2014.
